# Supplementary material for: Hypoxia-responsive microRNAs and trans-acting small interfering RNAs in Arabidopsis
Source: PubMed Central journal article supplement — J Exp Bot. 2009 Oct 8;61(1):165–77. doi: 10.1093/jxb/erp296 (PMC2791121; doi:10.1093/jxb/erp296), 2009-10-08
Supplement: erp296_1.pdf [file erp296_1.pdf]

## **Title**

Hypoxia Responsive MicroRNAs and Trans-Acting Small Interfering RNAs in  
Arabidopsis

Dov Moldovan, Andrew Spriggs, Jun Yang, Barry J. Pogson, Elizabeth S. Dennis,  
and Iain W. Wilson

## **Legends for Supporting Information**

**Fig. S1** Relative expression of ADH expression during hypoxia stress. Expression of ADH in 2.5 week old Col-0 plants exposed to 0.1% O<sub>2</sub> for 5 h compared to the control as measured by QRT-PCR.

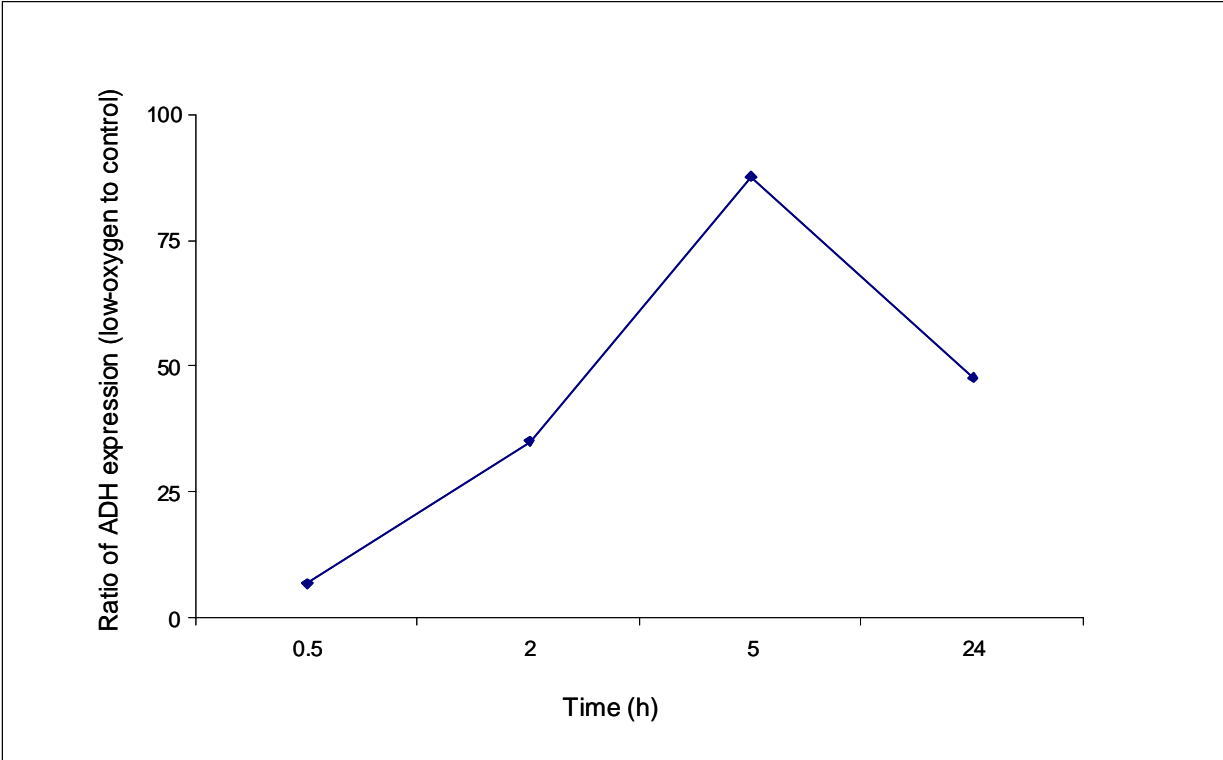

Fig. S1 Relative expression of ADH expression during low oxygen stress.

**Table S1.** Summary of the origin of small RNA sequencing data

| <b>Feature</b>            | <b>Reads</b> | <b>Sequences</b> |
|---------------------------|--------------|------------------|
| Arabidopsis genome        | 420,360      | 1,915,426        |
| CDS                       | 179,442      | 64,689           |
| Sense                     | 108,938      | 42,907           |
| Antisense                 | 69,053       | 21,016           |
| Both                      | 1,451        | 766              |
| UTR                       | 12,327       | 5,721            |
| Intron                    | 92,705       | 33,334           |
| Transposons (Retro)       | 211,752      | 104,490          |
| Intergenic                | 2,854,266    | 305,282          |
| Mitochondrial/chloroplast | 17,827       | 13,485           |

**Table S2.** Comparison of read numbers of miRNAs from different tissues.

| miRNA            | Reads/million      |        |             |
|------------------|--------------------|--------|-------------|
|                  | Roots <sup>#</sup> | Leaf   | Whole Plant |
| 156a,b,c,d,e,f   | 2043               | 129    | 53          |
| 156g             | 13                 | 0      | 0           |
| 156h             | 1                  | 0      | 1           |
| 157a,b,c         | 2258               | 99     | 20          |
| 157d             | 61                 | 0      | 1           |
| 158a             | 1876               | 18     | 100         |
| 158b             | 19                 | 0      | 0           |
| 159a             | 42                 | 666908 | 187933      |
| 159b             | 5                  | 196763 | 28615       |
| 160a,b,c         | 1                  | 3572   | 2426        |
| 161              | 44                 | 12214  | 9878        |
| 162              | 0                  | 203    | 393         |
| 163              | 1                  | 5476   | 3562        |
| 164a,b           | 993                | 449    | 500         |
| 164c             | 181                | 4      | 2           |
| 165a,b           | 5537               | 61     | 131         |
| 166a,b,c,d,e,f,g | 29631              | 1222   | 1170        |
| 167a,b           | 565                | 21379  | 14835       |
| 167d             | 1                  | 7789   | 3471        |
| 168a,b           | 3156               | 32666  | 7867        |
| 169a             | 2                  | 6923   | 1649        |
| 169b,c           | 2                  | 24     | 22          |
| 169d,e,f,g       | 28                 | 27     | 25          |
| 169h,i,j,k,l,m,n | 2                  | 715    | 218         |
| 170              | 0                  | 234    | 767         |
| 171a             | 0                  | 154    | 664         |
| 172a, b          | 19                 | 5131   | 4849        |
| 172c,d           | 1                  | 1      | 41          |

|          |     |      |       |
|----------|-----|------|-------|
| 172e     | 1   | 19   | 23    |
| 173      | 106 | 2    | 9     |
| 319a,b   | 0   | 1688 | 13807 |
| 390a,b   | 861 | 935  | 396   |
| 391      | 18  | 152  | 213   |
| 393      | 0   | 54   | 10    |
| 394      | 0   | 295  | 889   |
| 395a,d,e | 1   | 8    | 18    |
| 395b,c,f | 1   | 1    | 23    |
| 396      | 0   | 6585 | 2928  |
| 397      | 0   | 685  | 1015  |
| 398      | 0   | 443  | 234   |
| 399a     | 0   | 0    | 1     |
| 399b,c   | 1   | 9    | 16    |
| 399d     | 1   | 0    | 0     |
| 399f     | 4   | 0    | 4     |
| 400      | 1   | 23   | 12    |
| 402      | 0   | 2    | 4     |
| 403      | 1   | 55   | 74    |
| 408      | 47  | 1452 | 557   |
| 447a,b   | 1   | 68   | 50    |
| 472      | 0   | 22   | 15    |
| 771      | 0   | 1    | 22    |
| 773      | 0   | 195  | 186   |
| 774      | 0   | 0    | 0     |
| 775      | 6   | 202  | 190   |
| 776      | 0   | 5    | 1793  |
| 777      | 0   | 12   | 7     |
| 778      | 0   | 0    | 5     |
| 779      | 0   | 0    | 0     |
| 780      | 0   | 0    | 90    |
| 781      | 0   | 26   | 24    |
| 822      | 43  | 207  | 74    |

|     |     |      |     |
|-----|-----|------|-----|
| 823 | 3   | 30   | 31  |
| 824 | 11  | 3170 | 976 |
| 825 | 0   | 596  | 141 |
| 826 | 0   | 0    | 3   |
| 827 | 5   | 10   | 12  |
| 828 | 0   | 2    | 11  |
| 829 | 503 | 0    | 0   |
| 830 | 0   | 4    | 5   |
| 831 | 0   | 0    | 1   |
| 832 | 0   | 0    | 0   |
| 833 | 0   | 3    | 3   |
| 834 | 0   | 0    | 1   |
| 835 | 0   | 0    | 0   |
| 836 | 0   | 0    | 0   |
| 837 | 7   | 5    | 10  |
| 838 | 0   | 26   | 9   |
| 839 | 0   | 6    | 131 |
| 840 | 0   | 18   | 46  |
| 841 | 0   | 84   | 5   |
| 842 | 8   | 44   | 9   |
| 843 | 0   | 136  | 71  |
| 844 | 0   | 14   | 11  |
| 845 | 0   | 4    | 112 |
| 846 | 1   | 1492 | 729 |
| 847 | 0   | 483  | 47  |
| 848 | 4   | 22   | 16  |
| 849 | 0   | 1    | 4   |
| 850 | 0   | 1    | 1   |
| 851 | 0   | 0    | 4   |
| 852 | 1   | 10   | 9   |
| 853 | 0   | 5    | 0   |
| 856 | 0   | 0    | 2   |
| 857 | 0   | 7    | 17  |

|      |    |     |     |
|------|----|-----|-----|
| 858  | 0  | 2   | 9   |
| 859  | 0  | 2   | 16  |
| 860  | 0  | 11  | 15  |
| 861  | 0  | 9   | 5   |
| 862  | 1  | 14  | 4   |
| 863  | 0  | 0   | 0   |
| 864  | 0  | 57  | 59  |
| 865  | 0  | 4   | 3   |
| 866  | 0  | 2   | 2   |
| 867  | 0  | 0   | 81  |
| 868  | 0  | 0   | 1   |
| 869  | 19 | 3   | 111 |
| 870  | 0  | 2   | 3   |
| 1888 | 0  | NA* |     |

# Combined total from control and hypoxia stressed samples

\*No data available

**Table S3.** Stem-loop RT & QRT-PCR primer sequences

| smRNA                | Primer sequence                                     |
|----------------------|-----------------------------------------------------|
| miR157d/miR156g - RT | GTCGTATCCAGTGCAGGGTCCGAGGTATTTCGCACTGGATACGACGTGCTC |
| miR156g - QRT-PCR    | CCGGCGACAGAAGAGAGT                                  |
| miR157d - QRT-PCR    | GCGGTGACAGAAGATAGAG                                 |
| miR158a - RT         | GTCGTATCCAGTGCAGGGTCCGAGGTATTTCGCACTGGATACGACTGCTTT |
| miR158a - QRT-PCR    | CGGCGTCCCAAATGTAGAC                                 |
| miR159a - RT         | GTCGTATCCAGTGCAGGGTCCGAGGTATTTCGCACTGGATACGACTAGAGC |
| miR159a - QRT-PCR    | GCGGTTTGGATTGAAGGGA                                 |
| miR166g - RT         | GTCGTATCCAGTGCAGGGTCCGAGGTATTTCGCACTGGATACGACGGGGAA |
| miR166g - QRT-PCR    | GGTCGGACCAGGCTTCA                                   |
| miR172a - RT         | GTCGTATCCAGTGCAGGGTCCGAGGTATTTCGCACTGGATACGACATGCAG |
| miR172a - QRT-PCR    | GCGGGAGAATCTTGATGATG                                |
| miR391a - RT         | GTCGTATCCAGTGCAGGGTCCGAGGTATTTCGCACTGGATACGACTGGCGC |
| miR391a - QRT-PCR    | GCGGTTTCGAGGAGAGATA                                 |
| miR775 - RT          | GTCGTATCCAGTGCAGGGTCCGAGGTATTTCGCACTGGATACGACTGGCAC |
| miR775 - QRT-PCR     | GCCGGTTTCGATGTCTAGCA                                |
| ta-siR2140 - RT      | GTCGTATCCAGTGCAGGGTCCGAGGTATTTCGCACTGGATACGACCAGATG |
| ta-siR2140 - QRT-PCR | GCGGGATATCCCATTCTAC                                 |
| ta-siR289 - RT       | GTCGTATCCAGTGCAGGGTCCGAGGTATTTCGCACTGGATACGACTATGCT |
| ta-siR289 - QRT-PCR  | CCGGCCTTCTAAGTCCAACAT                               |
| Universal Reverse    | GTGCAGGGTCCGAGGT                                    |



**Table S4.** Primers for U6 loading control for QRT-PCR analysis of mature smRNAs

| <b>Target Gene</b> | <b>Forward Primer</b> | <b>Reverse Primer</b> |
|--------------------|-----------------------|-----------------------|
| U6                 | GATAAAATTGGAACGATACAG | ATTGGACCATTCTCGATT    |

**Table S5.** Target genes and primers used for QRT-PCR analysis

| Gene Assayed | Forward Primer         | Reverse Primer              |
|--------------|------------------------|-----------------------------|
| AT1G15940    | GGAAAGCCGAGGTTATTCTTG  | CAAGCACCAGTTGAGGATGAT       |
| AT1G27360    | TTTCAACTTCATGGCGAAGAT  | GAGTAGAGAAAATGGCTGCACA      |
| AT1G27370    | TCAAACATCTGGTGGGTTCTC  | GATCCCTTGTGAATCCGAAGT       |
| AT1G50990    | CACTGTTTATGCACGAAGAAGC | GTAAAATGCAGTTGGCCAGTC       |
| AT1G51670    | GAGCAAAACTGCATGTGTTCA  | CCATGGACTTTCCTTGATCT        |
| AT1G53160    | AGGTGGTGATGCAGAATCAAG  | CCACAATTTTAGGATTCTAAGAGAGAA |
| AT1G53290    | GCTCAGAAGAGAAATCGCAGA  | CAGCTTTGAAGAAAGCCAAAG       |
| AT1G64100    | TTTCTGCGACTGCCATAAGTT  | GGAGCAGCGTGTTAAAGGTAA       |
| AT1G68840    | TTTTCCGATTTTATGCTTTCG  | TTTCCACAAAACCATTGTTCC       |
| AT1G69170    | CCACGGAAGTATCCTCCATTT  | GGGTGATTGAGAACGTTGTGT       |
| AT2G26950    | CAGCCATTTGTTTGAAATGT   | TTGTTCTGCTCCAAAAGTCT        |
| AT2G26960    | TCTCCTCCTGGACCTCTTGTT  | GGCATTGGGTTAGGTTGATCT       |
| AT2G28550    | AAACAAGCGCCGTGAGAC     | TAACCACGTGTTGCATTGTCA       |
| AT2G32460    | TCGAGTTCTTCCCTTTAGGA   | TCAAGATGGACACCATTGTCA       |
| AT2G33810    | ATCCCGGTTTGAAGGTTAATG  | GGCTTGAAATAACATTTGACAAG     |
| AT2G34010    | TCTCCAGGAGCAGGAAGATTT  | TGGCCTCTTCTTAGCAGTGAA       |
| AT2G39250    | CGGGATATCTACCGATCACAG  | TCACCTCATGGATCAAACAAG       |
| AT2G42090    | ACGTCTCCATGCAATCTGTTC  | GGGAGTGCGTAACCTTCGTAT       |
| AT2G42200    | AGGGACAAGCTTCTCATCTCC  | GTTGTCATGTGGTTGATGTGG       |
| AT3G03580    | CAGATTCCTTCACGTTTCAA   | ACCACCACAACGGAATTAACA       |
| AT3G11440    | TGATGATGGTTCCTGATAGCC  | CGTCTTCCACTGATCAAATGC       |
| AT3G15270    | ACTCATCATTCAAGCGACCAC  | CCATGACCAACTTTTCTTGACA      |
| AT3G27230    | GCAAGGAATGTGTTGGTTGTT  | ATCCACCCTAATATCGAACC        |
| AT3G54990    | TATTTTTACCCATGGCAACCA  | AATTGGACATGGAGGAAGAGG       |
| AT3G57920    | GAAACCCATCCACACATGAAT  | TGTTGGTGTCTGAAGTTGCTG       |
| AT3G60460    | GAAAGCCGAAGAAGACGAAGT  | TATTGACCCAACGAAGACGAC       |
| AT3G61320    | CATTGGATTGTTGTTCTGCT   | CTATGCACAAGATCGCAAAGC       |
| AT4G05360    | TGCAGTCATGAGGGTTTAAGG  | CTTCAAATCTCCCCCTTTTTG       |
| AT4G29760    | AGGGAGTTTACAAAGGCCTCA  | ACAGAATCTCCCTCGAACTCC       |
| AT4G29770    | AAGCTGGGTATGCAACAACC   | CTTGATCTTCTCCGCCTCAAC       |

|            |                        |                       |
|------------|------------------------|-----------------------|
| AT4G36920  | CTCGACGAACCAAGTGTGAC   | CAGCCAATTTTGATGAGGAGT |
| AT4G37770  | TTATCATGGCCTTCCTTCCTT  | GAGAGTCTCGTTAGCCGGAGT |
| AT5G06100  | ATAGCCATACCCCTACGGATG  | TGTGGAGGAGATGACGATTC  |
| AT5G18040  | CCATGTGTTTCAGTCCAGACCT | CCTCGGACTTATCACTGCAA  |
| AT5G18065  | TCCATGTCTTCAGTCCAGAGC  | TTCCCTCGGACTTATCCACT  |
| AT5G18100  | CTGGCTTCCATGGATTTTATA  | CCTGCAAGAATGTTACCCAAA |
| AT5G42670  | GAGAGGAGCCGAACCTAAAGA  | CCACTCGAAACGAACAATCAT |
| AT5G43270  | CACATGGGTGCTTCTCAAGAT  | AGGGATGGTGATCAAGGGTAA |
| AT5G50570, |                        |                       |
| AT5G50670  | CGTTGTGTGAGAGAATGACGA  | AAGTGGTGGTTGAAGCAAATG |
| AT5G52070  | TATGGAATCGGATGGAATTGA  | TCACATTCCAGAGGAAGATGG |
| AT5G55020  | CCAACCCAGTTTACTCCATGA  | CTTCTATGAGCACCGGAACTG |
| AT5G60120  | GCATGATCAGTCCAGTGGTG   | GCTGATTCAGATTGACGAAGG |
| AT5G67180  | TAGCAATGATGACGACGACTG  | GATGATGAATCAGGGACGAGA |
